# Supplementary material for: An NBD-armed tetraaza macrocyclic lysosomal-targeted fluorescent probe for imaging copper(ii) ions
Source: Royal Society of Chemistry journal article supplement (doi:10.1039/c3cc46585c), 2013-01-01
Supplement: c3cc46585c.pdf [file c3cc46585c.pdf]

## Experimental

**General:** All the starting materials were of reagent quality and were obtained from commercial sources without further purification. 3-(4,5-dimethyl-2-thiazoly)-2,5-diphenyl-2H-tetrazolium bromide (MTT) was purchased from Sigma. Hoechst 33358, Mitotracker Red, BODIBY TR ceramide, and DND-99 were bought from Keygen. All the emission spectra were obtained using a PerkinElmer LS 55 fluorescence spectrometer. The electrospray ionization mass spectra were determined by a LCQ Fleet ThermoFisher mass spectrometer.  $^1\text{H}$  NMR and  $^{13}\text{C}$  NMR spectra in  $\text{CDCl}_3$  were measured on a Bruker DRX-500 spectrometer at  $25 \pm 1^\circ\text{C}$ . The pH values of sample solutions were monitored by a PHS-3 system. Confocal fluorescence and brightfield imaging were performed with a Zeiss LSM 710 microscope. 1,4,7-Tritosyl-1,4,7-triazaheptane was prepared according to a reported procedure<sup>1</sup> in 64% yield. 2,6-Bis(bromomethyl)pyridine and the mother ring 3,6,9,15-tetraazabicyclo[9.3.1] pentadeca-1(15),11,13-triene (**1**) were synthesized following the procedure described by references<sup>2,3</sup> in the yields of 49% and 65%, respectively.

### Synthesis of probe L:

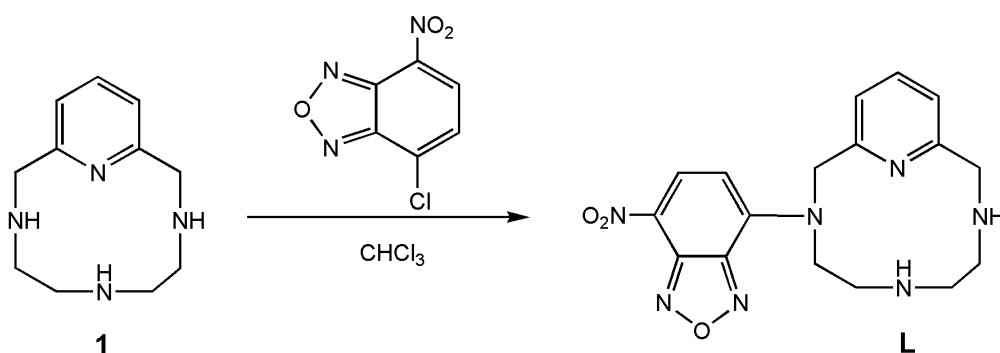

4-chloro-7-nitrobenzofurazan (NBD-Cl) (199 mg, 1 mmol) in 50 mL of  $\text{CHCl}_3$  was added to a 200 mL  $\text{CHCl}_3$  solution of **1** (618 mg, 3 mmol) and  $\text{Et}_3\text{N}$  (102 mg, 1 mmol). The resulting mixture was then heated at  $60^\circ\text{C}$  and stirred for 4 h under  $\text{N}_2$  ambient. After being cooled to room temperature, the obtained mixture was washed with 1 M NaOH solution ( $20\text{ mL} \times 3$ ) and then with redistilled water ( $20\text{ mL} \times 3$ ). The organic layer was dried over anhydrous sodium sulfate overnight and evaporated to give the solid crude product. The residue was purified over column chromatography and eluted with a gradient of chloroform to methanol (10:1, v/v), yielding the product **L** as a dark red solid (155 mg, 42%). Mass: ESI-MS ( $\text{CH}_3\text{CN}$ ),  $m/z$  (%): 370.33(100) [ $\text{MH}^+$ ];  $^1\text{H}$  NMR (500 MHz,  $\text{CDCl}_3$ )  $\delta$  8.38 (d,  $J = 9.1$  Hz, 1H), 7.70 (t,  $J = 7.7$  Hz, 1H), 7.32 (d,  $J = 7.6$  Hz, 1H), 7.05 (d,  $J = 7.6$  Hz, 1H), 6.47 (s, 1H), 5.32 (d,  $J = 18.7$  Hz, 2H), 4.57 (s, 2H), 3.92 (s, 2H), 3.06 (s, 2H), 2.80 (s, 2H), 2.68 (s, 2H);  $^{13}\text{C}$  NMR (126 MHz,  $\text{CDCl}_3$ )  $\delta$  160.02, 154.61, 146.23, 144.78, 137.79, 135.28, 129.78, 127.35, 121.13, 120.26, 103.25, 59.02, 55.07, 52.02, 48.52, 47.75, 46.00 ppm.

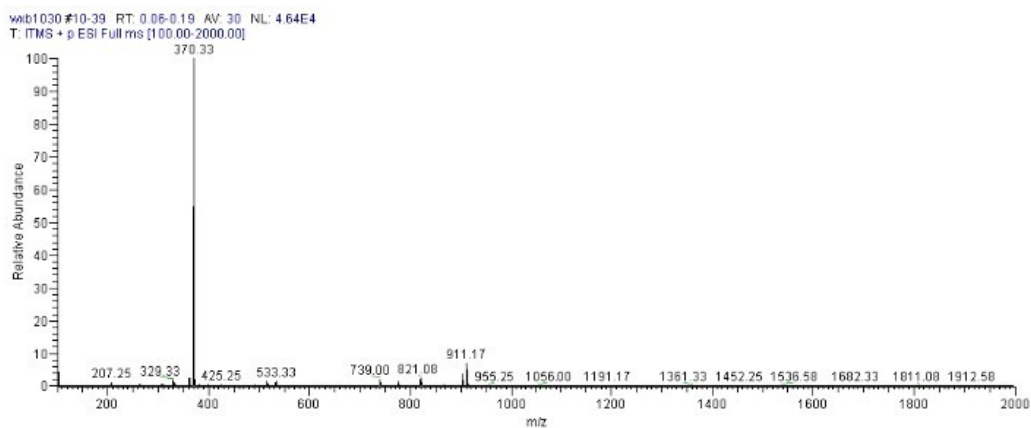

Fig. S1 ESI-MS spectrum of **L** in CH<sub>3</sub>CN.

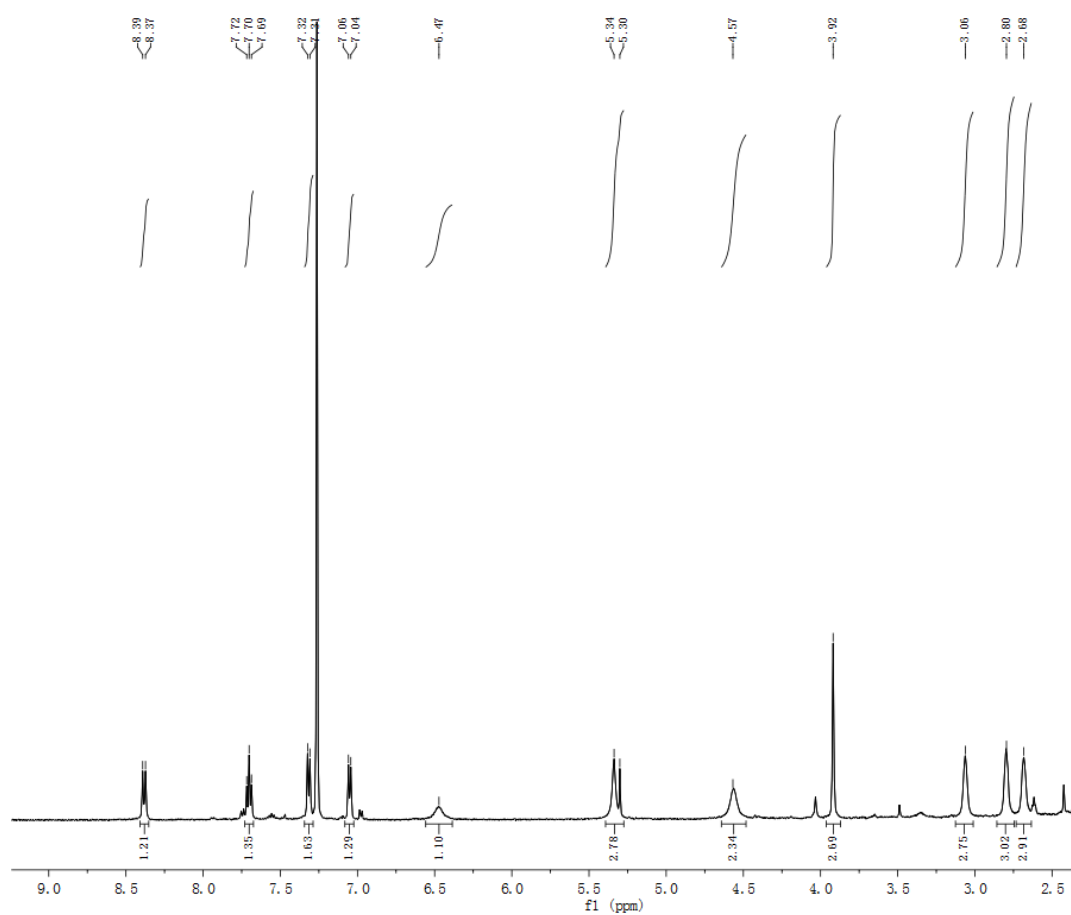

Fig. S2 <sup>1</sup>H NMR spectrum of **L** in CDCl<sub>3</sub> (500 MHz).

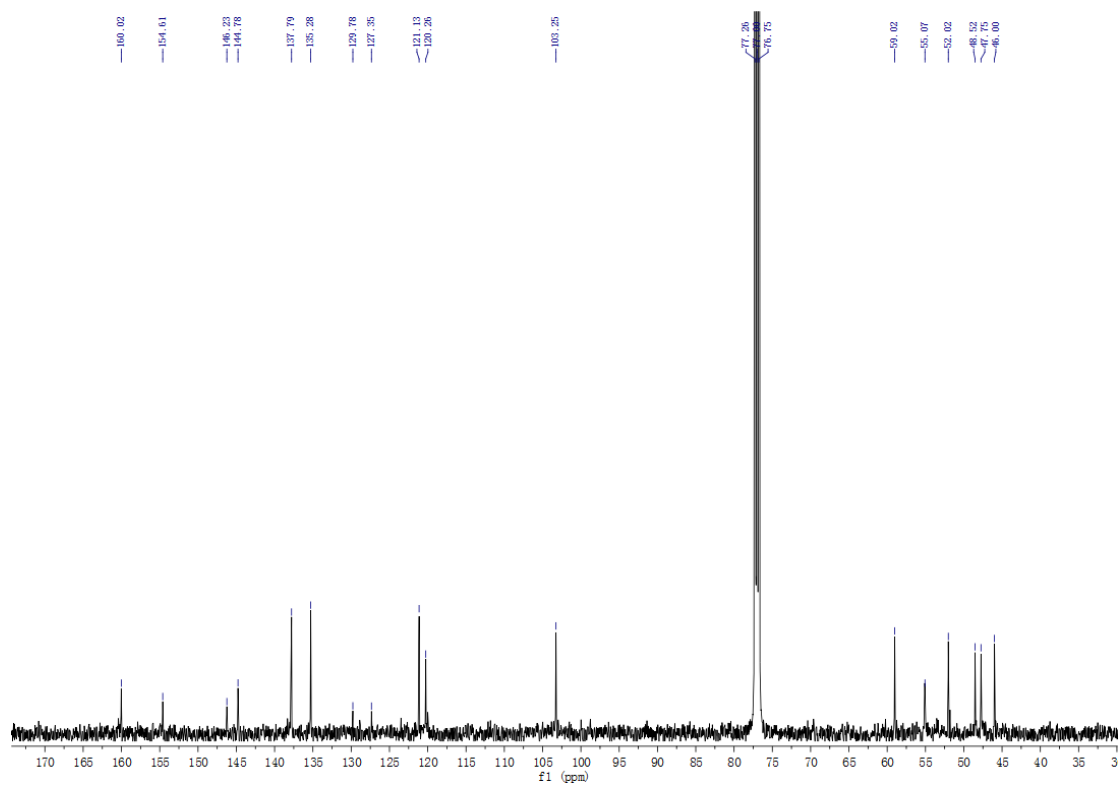

**Fig. S3**  $^{13}\text{C}$  NMR spectrum of **L** in  $\text{CDCl}_3$  (126 MHz).

### **Cell culture:**

Human cervix carcinoma HeLa cells were obtained from the Cell Bank of the Chinese Academy of Sciences, Shanghai, China. Cells were grown in DMEM (Gibco, USA) supplemented with 10% fetal bovine serum (Gibco, USA) in a humidified atmosphere at 37 °C.

### **Cytotoxicity assay:**

3-(4,5-Dimethylthiazol-2-yl)-2,5-diphenyltetrazolium bromide (MTT) assays were applied to test cell viability. Briefly,  $2 \times 10^4$  HeLa cells were seeded onto 96-well plates (Corning, NY, USA) and incubated for 12 h. Then different concentrations of **L** were added to the wells and incubated for 24 h. Thereafter, 20  $\mu\text{L}$  of MTT ( $0.5 \text{ mg} \cdot \text{cm}^{-3}$  final concentration) was added to each well. After incubation for 4 h, 150  $\mu\text{L}$  of DMSO was added to the cultures to dissolve the crystals. The absorption values at 570 nm were monitored by an automatic enzyme-linked immunosorbent assay plate reader (Thermo Scientific, USA).

### **Cell imaging:**

$5 \times 10^4$  HeLa cells were plated in Confocal dish (Corning, NY, USA) and incubated for 12 h. For co-staining studies, cells were incubated with Hoechst 33358 (Invitrogen, final concentration 0.8  $\mu\text{M}$ ) or Mitotracker Red (Invitrogen, final concentration 25 nM) for 10 min or LysoTracker Red (Invitrogen, final concentration 50 nM) for 30 min at 37 °C before being stained with **L** (100  $\mu\text{M}$ ) for 30 min at 37 °C. Incubations with BODIPY TR ceramide (Invitrogen, final concentration 5  $\mu\text{M}$ ) were performed for 30 min at 4°C, followed by three wash steps with ice-cold HBBS/HEPES (200 mL) and an additional incubation for 30 min at 37 °C prior to being stained with **L** (100  $\mu\text{M}$ ). Fluorescence images were obtained with a laser scanning confocal fluorescence microscope (Zeiss LSM 710).

### **ICP-MS analysis:**

$5 \times 10^4$  HeLa cells were plated and treated with **L** and  $\text{CuCl}_2$ . Cells were collected and stored at -80 °C until further testing. 100  $\mu\text{L}$  of concentrated nitric acid ( $\text{HNO}_3$ ) was added to each sample and heated for 2 h at 90 °C. Samples were allowed to add 25  $\mu\text{L}$   $\text{H}_2\text{O}_2$  for another 2 h at 90 °C. Then the samples were added 40  $\mu\text{L}$  of concentrated hydrochloric acid (HCl) and digested overnight at room temperature and diluted to 1:25 with 1%  $\text{HNO}_3$  prior to analysis. Analysis was carried out on a Varian UltraMass ICP-MS instrument that had been calibrated using 0, 10, 50, and 100 ppb of a certified multielement ICP-MS standard solutions (ICP-MS-CA12-1, AccuStandard). A certified internal standard solution containing 100 ppb copper was also used as the internal control (ICPMS-IS-MIX1-1, AccuStandard).

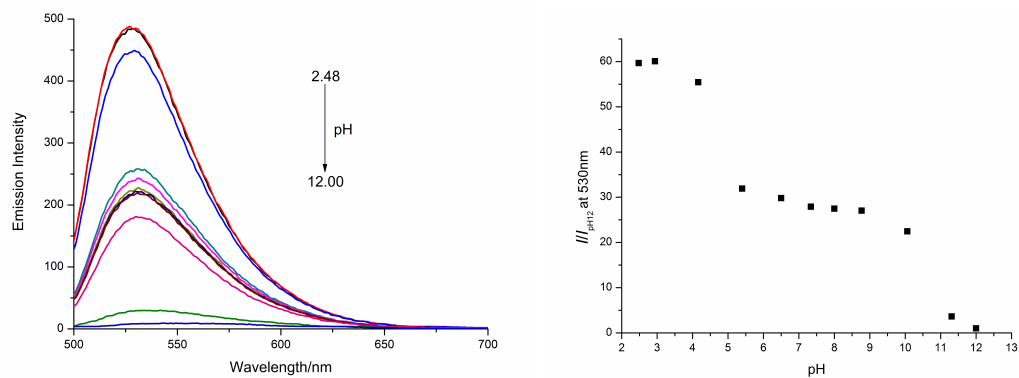

**Fig. S4** Emission spectra of 20 μM L in water containing 0.15 M NaCl at different pH (left).  $\lambda_{\text{ex}} = 470$  nm. Fluorescent pH titration profile of L according to  $I/I_{\text{pH}12}$  at 530 nm (right).

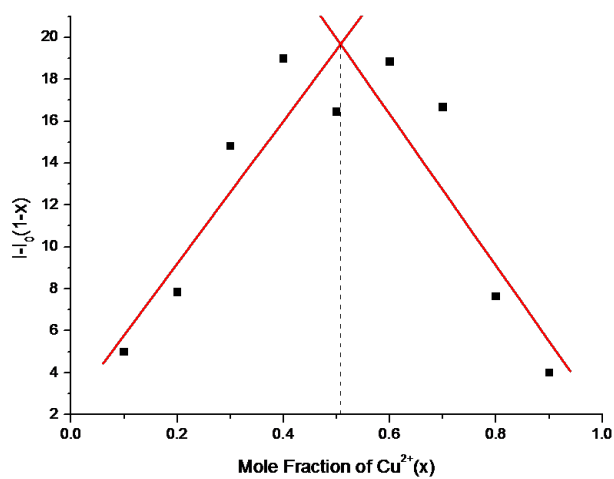

**Fig. S5** Job's plot for the binding between L and  $\text{Cu}^{2+}$ .  $[\text{L}] + [\text{Cu}^{2+}] = 20$  μM.

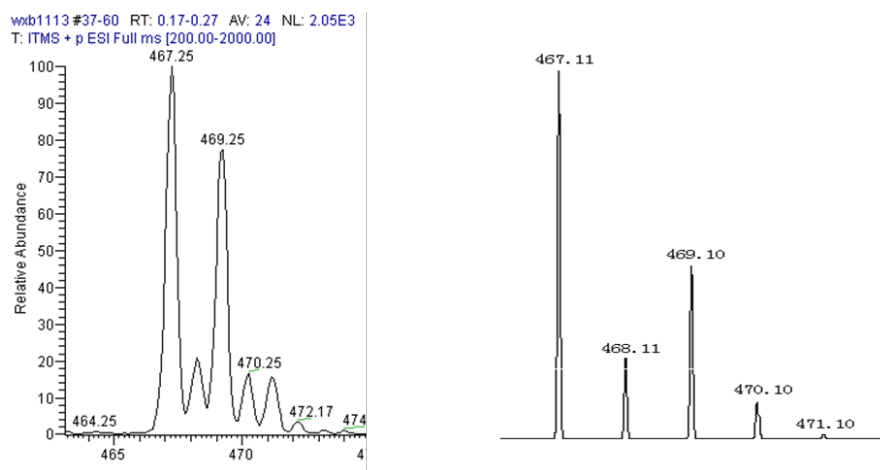

**Fig. S6** Observed electrospray ionization (ESI) mass spectrum and calculated isotop patterns for  $L-Cu^{2+}$ .

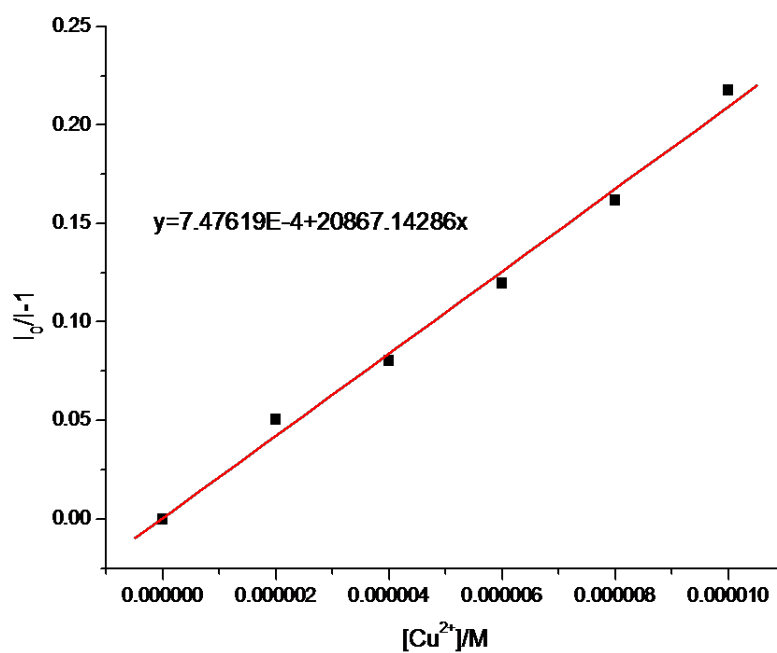

**Fig. S7** Emission change of **L** induced by  $Cu^{2+}$  titration. The binding constant was obtained by linear fitting to the data, and the red line is the resulting fitting line.

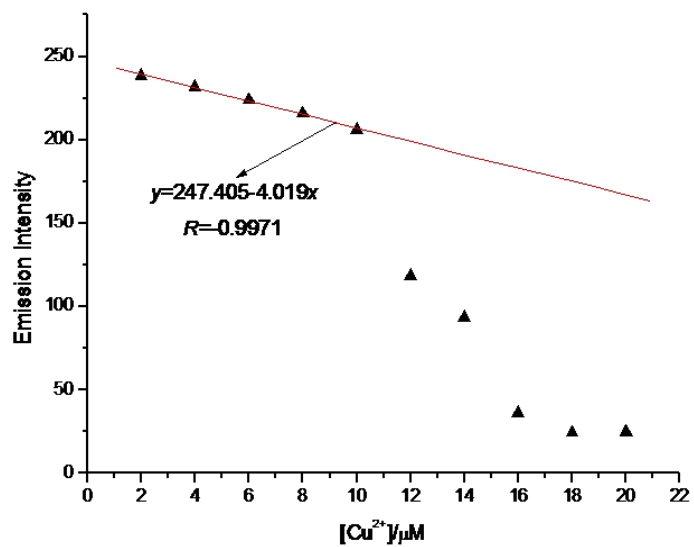

**Fig. S8** A plot of emission intensity vs [Cu<sup>2+</sup>], the standard deviation (SD) is 1.1297 and the calculated detection limit of L-Cu<sup>2+</sup> is  $8.4 \times 10^{-7}$  M..

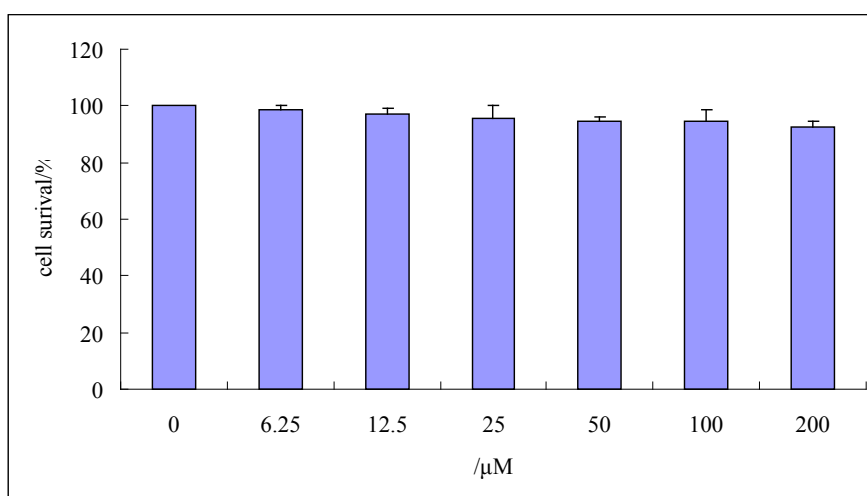

**Fig. S9** MTT experiments of L performed with HeLa cells.

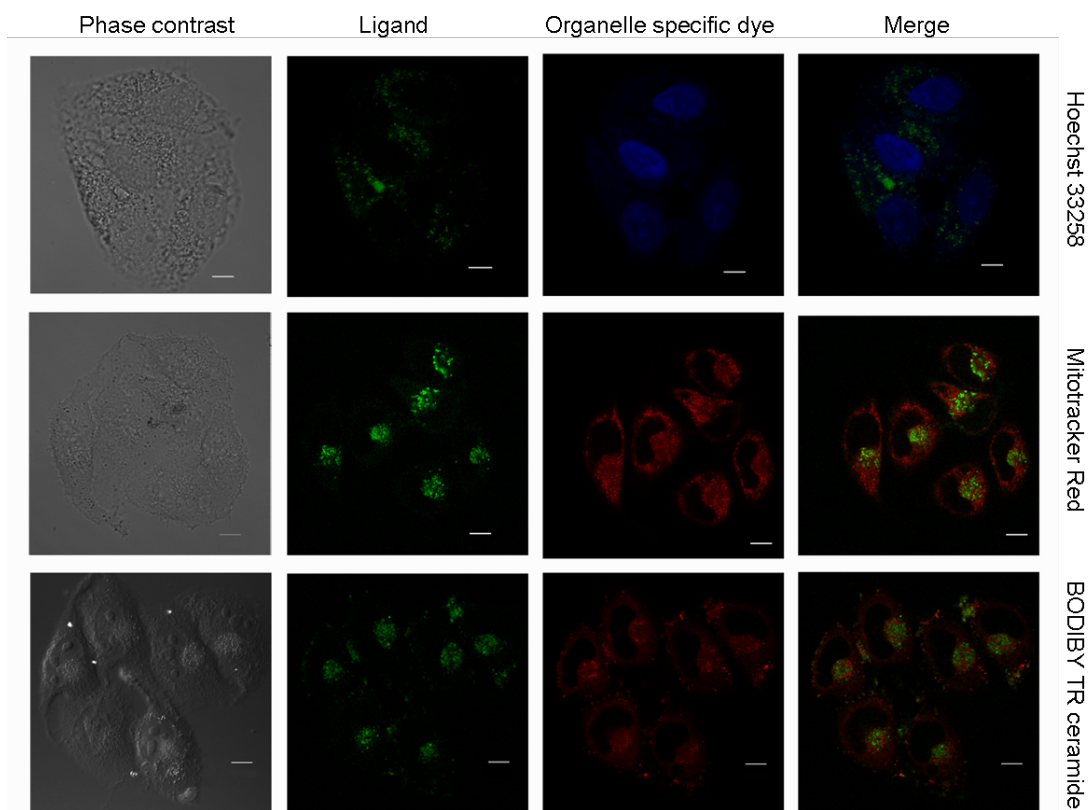

**Fig. S10** Co-localization studies of **L** with organelle-specific dyes in HeLa cells. Cells were stained with nucleus maker Hoechst 33258 (0.8  $\mu\text{M}$ ) for 30 min at 37°C, or mitochondrial dye Mitotracker Red (25 nM) for 30 min at 37°C, or Golgi dye BODIPY TR ceramide (5  $\mu\text{M}$ ) for 30 min at 4°C, before being incubated with **L** (100  $\mu\text{M}$ ) for 30 min at 37°C. Nucleus staining (blue), Mitochondria or Golgi staining (red) and **L** localization (green).  $\lambda_{\text{ex}} = 488 \text{ nm}$ ; Scale bars: 10  $\mu\text{m}$ .



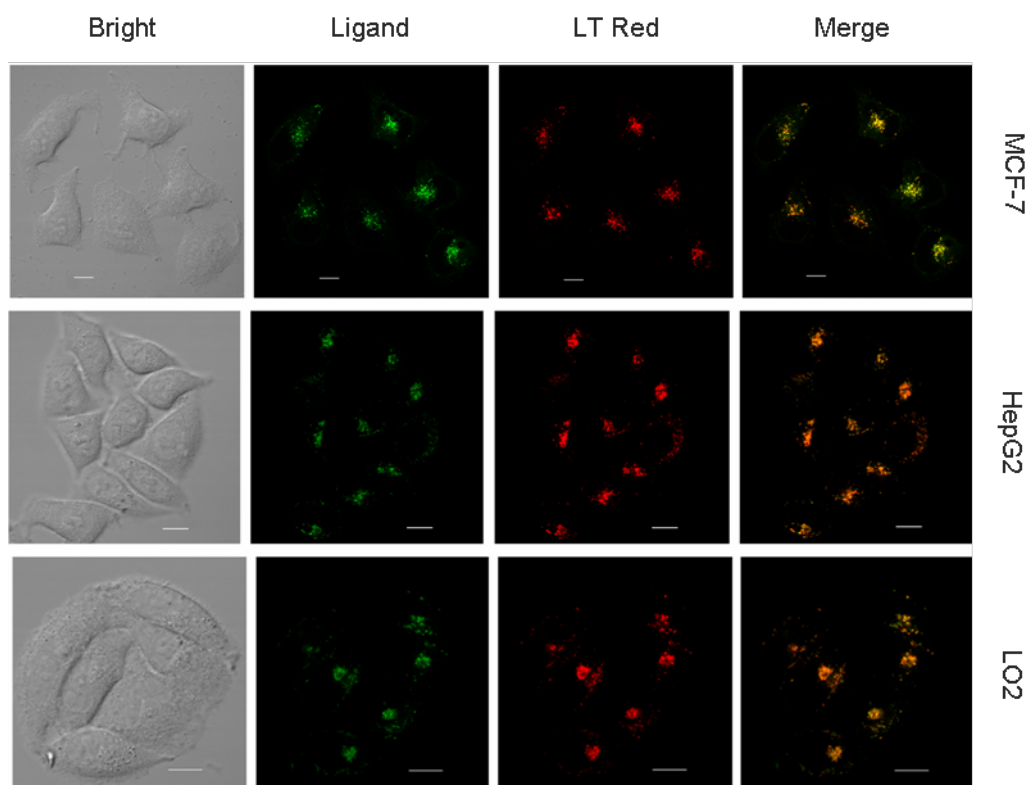

**Fig. S11** Co-localization studies of **L** with LysoTracker Red in MCF-7, HepG2 and LO2 cells. Cells were stained with LysoTracker Red (50 nM) for 30 min at 37°C, before being incubated with **L** (100 µM) for 30 min at 37°C.  $\lambda_{\text{ex}} = 488 \text{ nm}$ ; Scale bars: 10 µm.

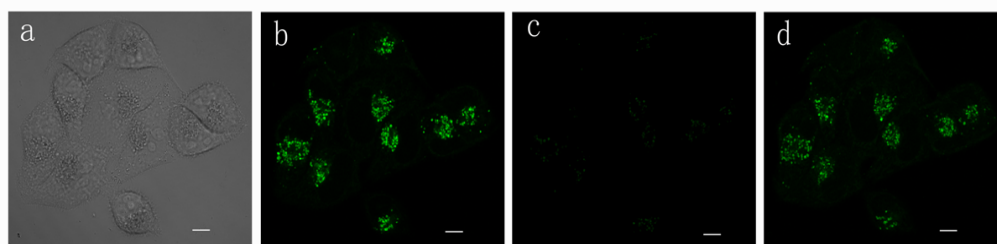

**Fig. S12** Brightfield and fluorescence images of HeLa cells. (a) Brightfield image of cells, (b) cells stained with probe **L** (100 µM) for 30 min at 37°C, (c) then incubated with  $\text{CuCl}_2$  (100 µM) for 30 min at 37°C after (a), (d) further incubated with TPEN (50 µM) for 10 min at 37°C.  $\lambda_{\text{ex}} = 488 \text{ nm}$ ; Scale bars: 10 µm.

#### References:

- 1 H.Koyama and T. Yoshino, *Bull. Chem. Soc. Jpn.*, 1972, **45**, 481.
- 2 X. M. Zhang, *WO Pat.*, 97/13763, 1997.
- 3 G. E. Kiefer, J. Simon and J. R. Garlich, *WO Pat.*, 94/26754, 1994.
